# Supplementary material for: A multi-walled carbon nanotube/poly-2,6-dichlorophenolindophenol film modified carbon paste electrode for the amperometric determination of l-tyrosine
Source: Royal Society of Chemistry journal article supplement (doi:10.1039/c5ra18329d), 2015-01-01
Supplement: c5ra18329d1.pdf [file c5ra18329d1.pdf]

## Electronic Supplementary Data

### **A multi-walled carbon nanotubes/poly-2, 6 – Dichlorophenolindophenol film modified carbon paste electrode for the amperometric determination of L-Tyrosine**

Ozma J D'Souza<sup>a</sup>, Ronald J Mascarenhas<sup>b,a\*</sup>, Ashis K Satpati<sup>c</sup>, Irishi N Namboothiri<sup>d</sup>, Simon Detriche<sup>e</sup>, Zineb Mekhalif<sup>e</sup>, Joseph Delhalle<sup>e</sup>

<sup>a</sup>Research and Development Centre, Bharathiar University, Coimbatore – 641 014, Tamilnadu, India.

<sup>b</sup>Electrochemistry Research Group, Department of Chemistry, St. Joseph's College, Lalbagh Road, Bangalore – 560 027, Karnataka, India.

<sup>c</sup>Analytical Chemistry Division, Bhabha Atomic Research Centre, Trombay, Mumbai – 400 094, Maharashtra, India.

<sup>d</sup>Department of Chemistry, Indian Institute of Technology Bombay, Powai, Mumbai – 400 076, India.

<sup>e</sup>Laboratoire de Chimie et d'Electrochimie des Surface, University of Namur, 61 Rue de Bruxelles, B-5000 Namur, Belgium.

**\*Corresponding authors tel: +91 9448756584 Fax: +91 8022245831**

E-mail address: [ronaldmasc2311@yahoo.co.in](mailto:ronaldmasc2311@yahoo.co.in) (R.J. Mascarenhas).

**Fig. S1:** Cyclic voltammograms of electropolymerization of DCPIP on CPE (a) and MCPE/MWCNTs (b).

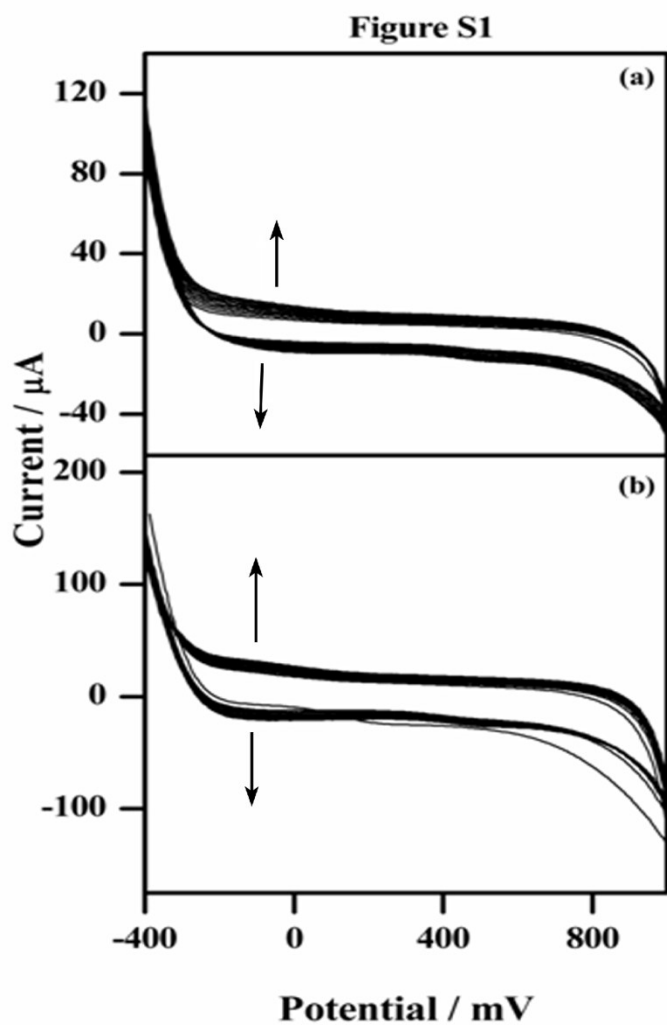

**Scheme S1:** Proposed mechanism of electropolymerization of DCPIP.

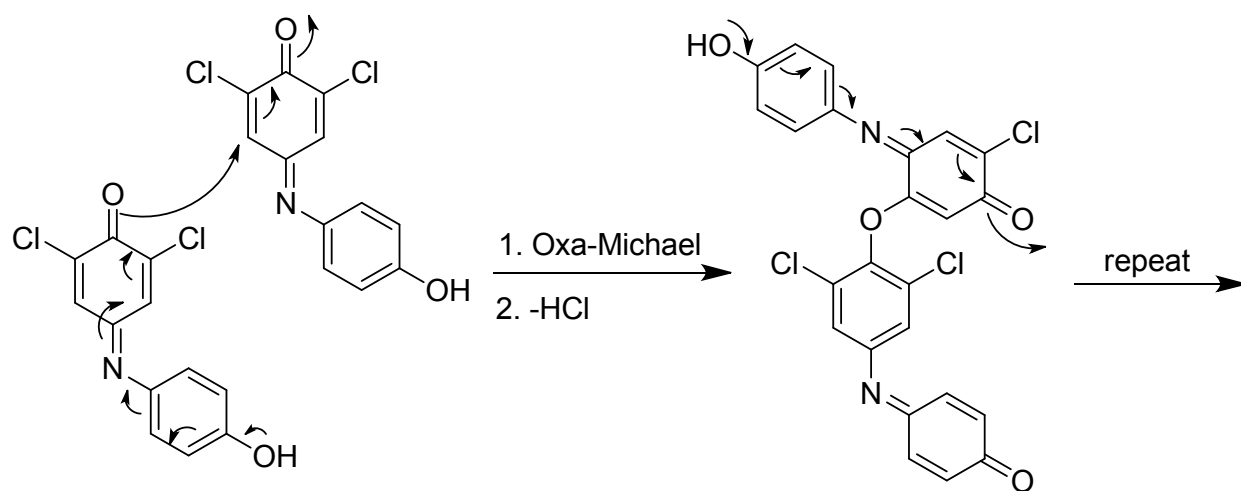

**Fig. S2:** Nyquist plots of 2.0 mM  $K_3[Fe(CN)_6]/K_4[Fe(CN)_6]$  (1:1) in 0.1 M KCl. Inset: equivalent circuit.

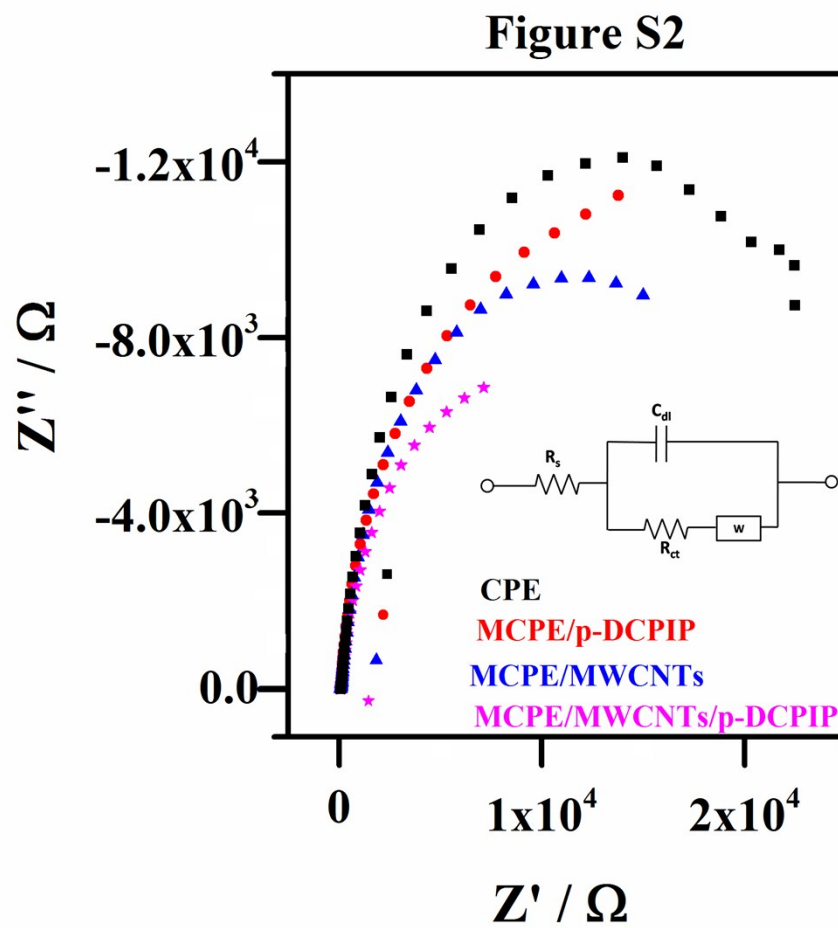

**Fig. S3:** Cyclic voltammograms of various concentrations of Tyr (in mM): 0.5, 1.0, 1.5, 2.0, 2.5 and 3.0 (a→ f) at MCPE/MWCNTs/p-DCPIP in 0.1 M PBS of pH 7.0 containing 0.1 M KCl at a scan rate of  $50 \text{ mV s}^{-1}$ . The inset shows plot of the variation of  $I_{pa}$  with concentration of Tyr.

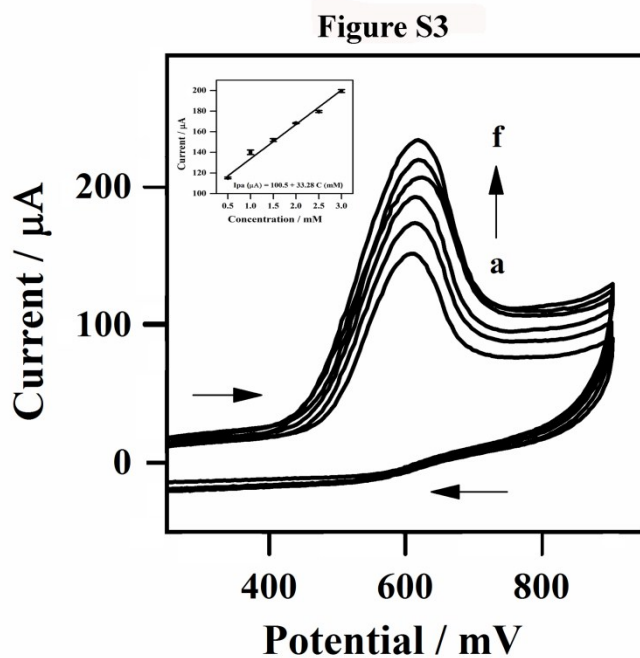

**Fig. S4:** Cyclic voltammograms of  $5 \times 10^{-4}$  M of Tyr at various scan rates ( in  $\text{mV s}^{-1}$ ): 150, 125, 100, 75, 50, 25 and 10 (a→ g) at MCPE/MWCNTs/p-DCPIP in 0.1 M PBS of pH 7.0 containing 0.1 M KCl. Inset represents the plot of the variation of  $I_{pa}$  with scan rate.

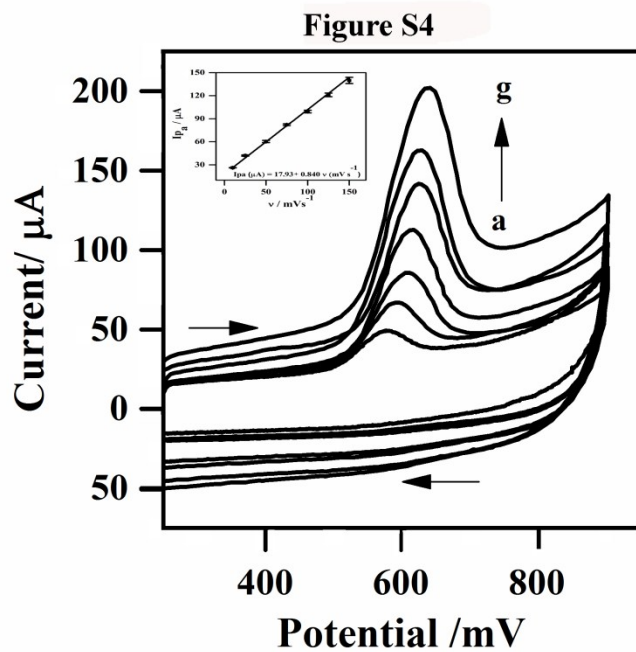

Fig. S5: Calibration plot of  $E_{pa}$  with  $\log v$

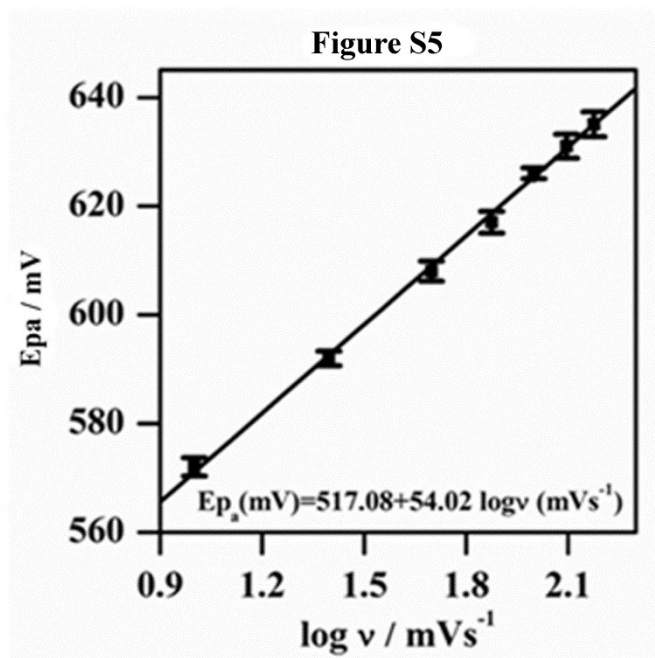

**Fig. S6:** Plot of variation of (a)  $I_{pa}$  and (b)  $E_{pa}$  of  $5.0 \times 10^{-4}$  M Tyr in 0.1 M PBS of different pH at MCPE/MWNCTs/p-DCPIP at a scan rate  $50 \text{ mV s}^{-1}$ .

**Figure S6**

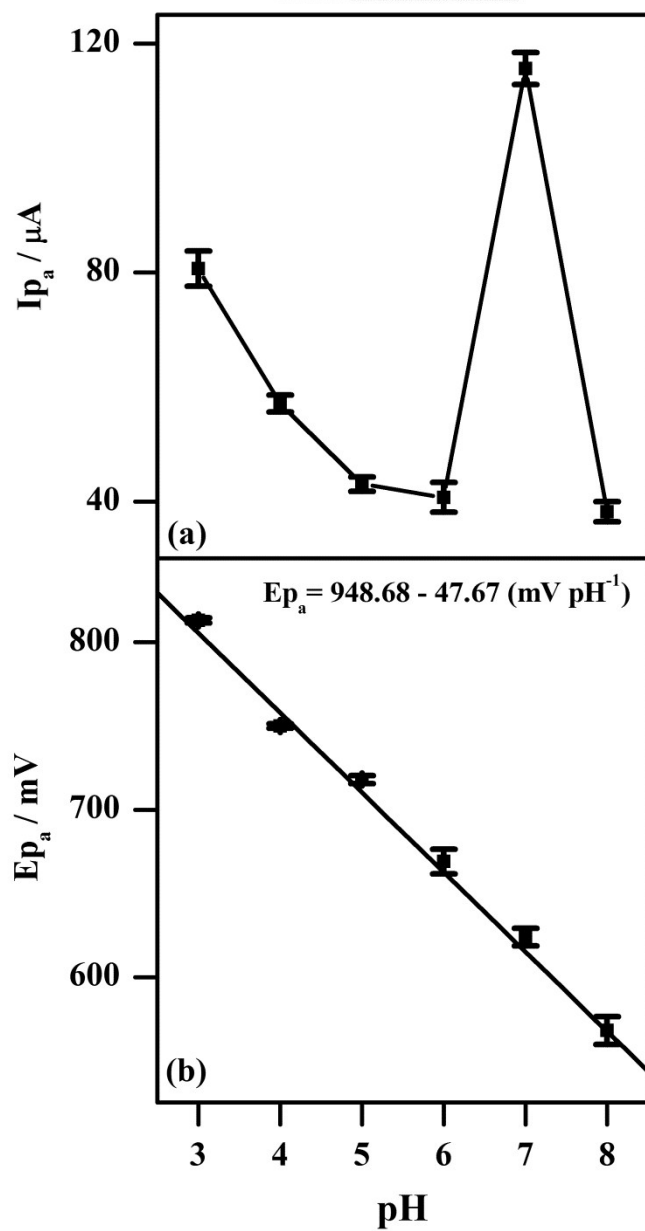



**Fig. S7:** Cyclic voltammograms of  $5.0 \times 10^{-4}$  M Tyr in 0.1 M PBS of different pH of 3, 4, 5, 6, 7 and 8 (f ← a) containing 0.1 M KCl at MCPE/MWCNTs/p-DCPIP at a scan rate of  $50 \text{ mVs}^{-1}$ .

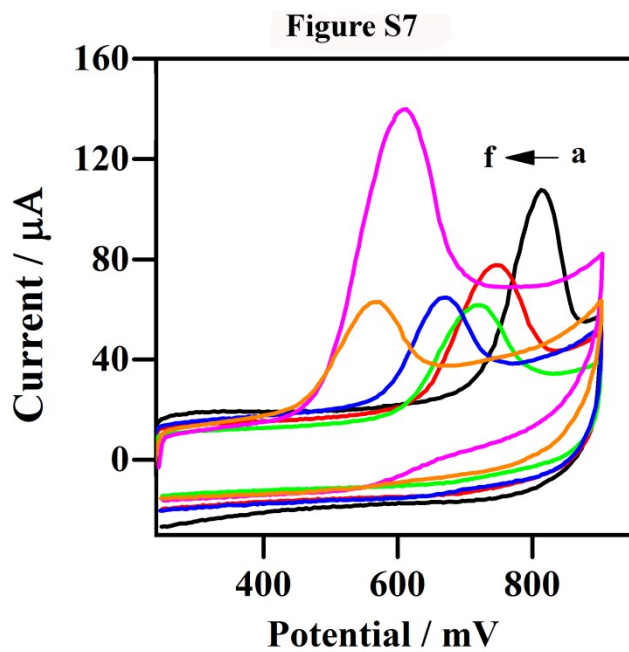

**Fig. S8:** Effect of volume of MWCNTs suspension on CPE (a) Concentration of DCPIP for the electropolymerisation (b) Scan rate variation on electropolymerisation (c) and number of electropolymerisation cycles (d) on  $I_{pa}$  of  $5.0 \times 10^{-4}$  M Tyr in 0.1 M PBS of pH 7.0 containing 0.1 M KCl at a scan rate of  $50 \text{ mV s}^{-1}$ .

**Figure S8**

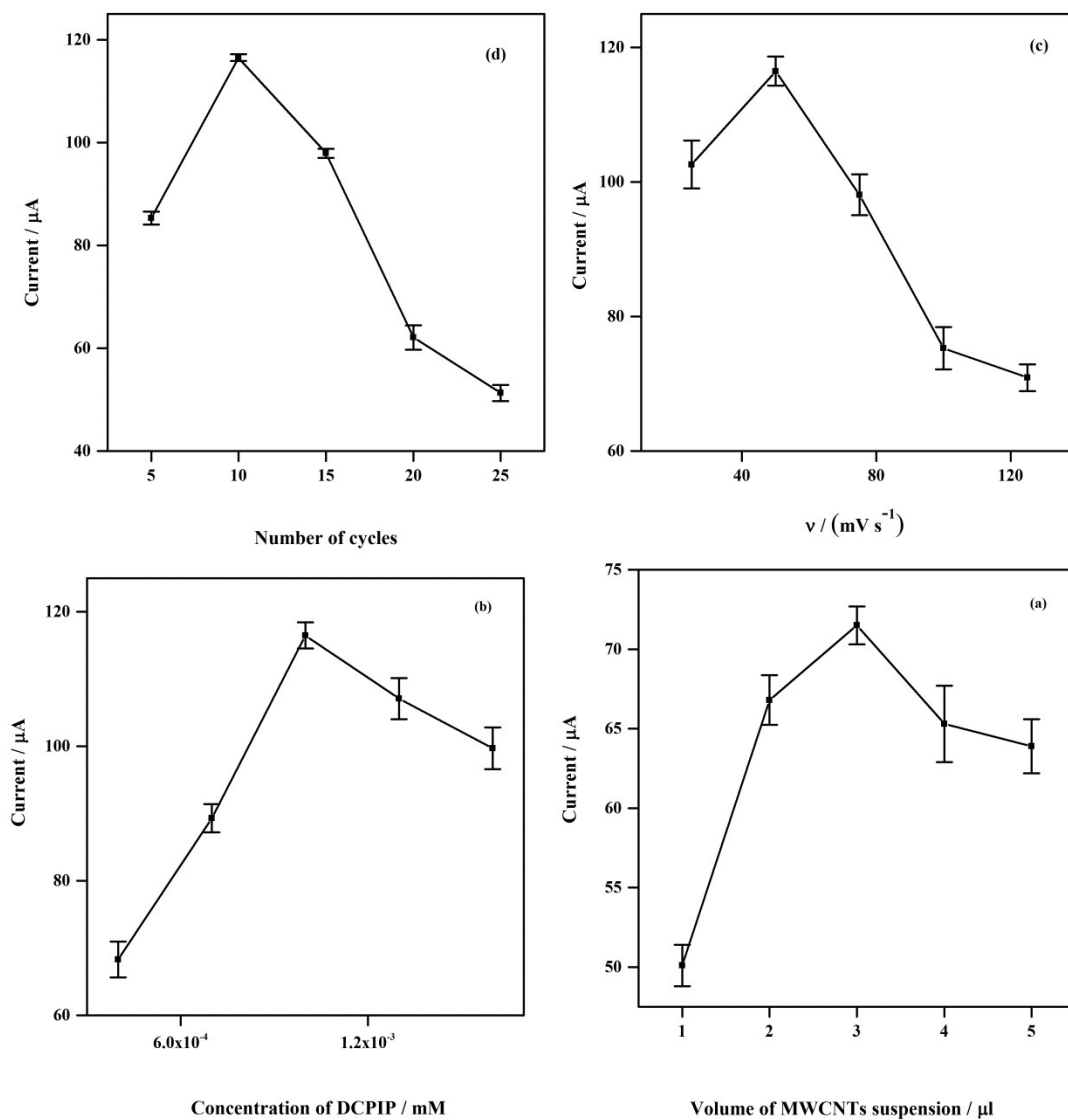

**Fig. S9:** Plots showing change in absorbance of Tyr measured at (a) 229 nm and (b) 274 nm with time at a constant applied potential. Cottrell treatment of the plots of variation in absorbance with time at (c) 229 nm and (d) 274 nm.

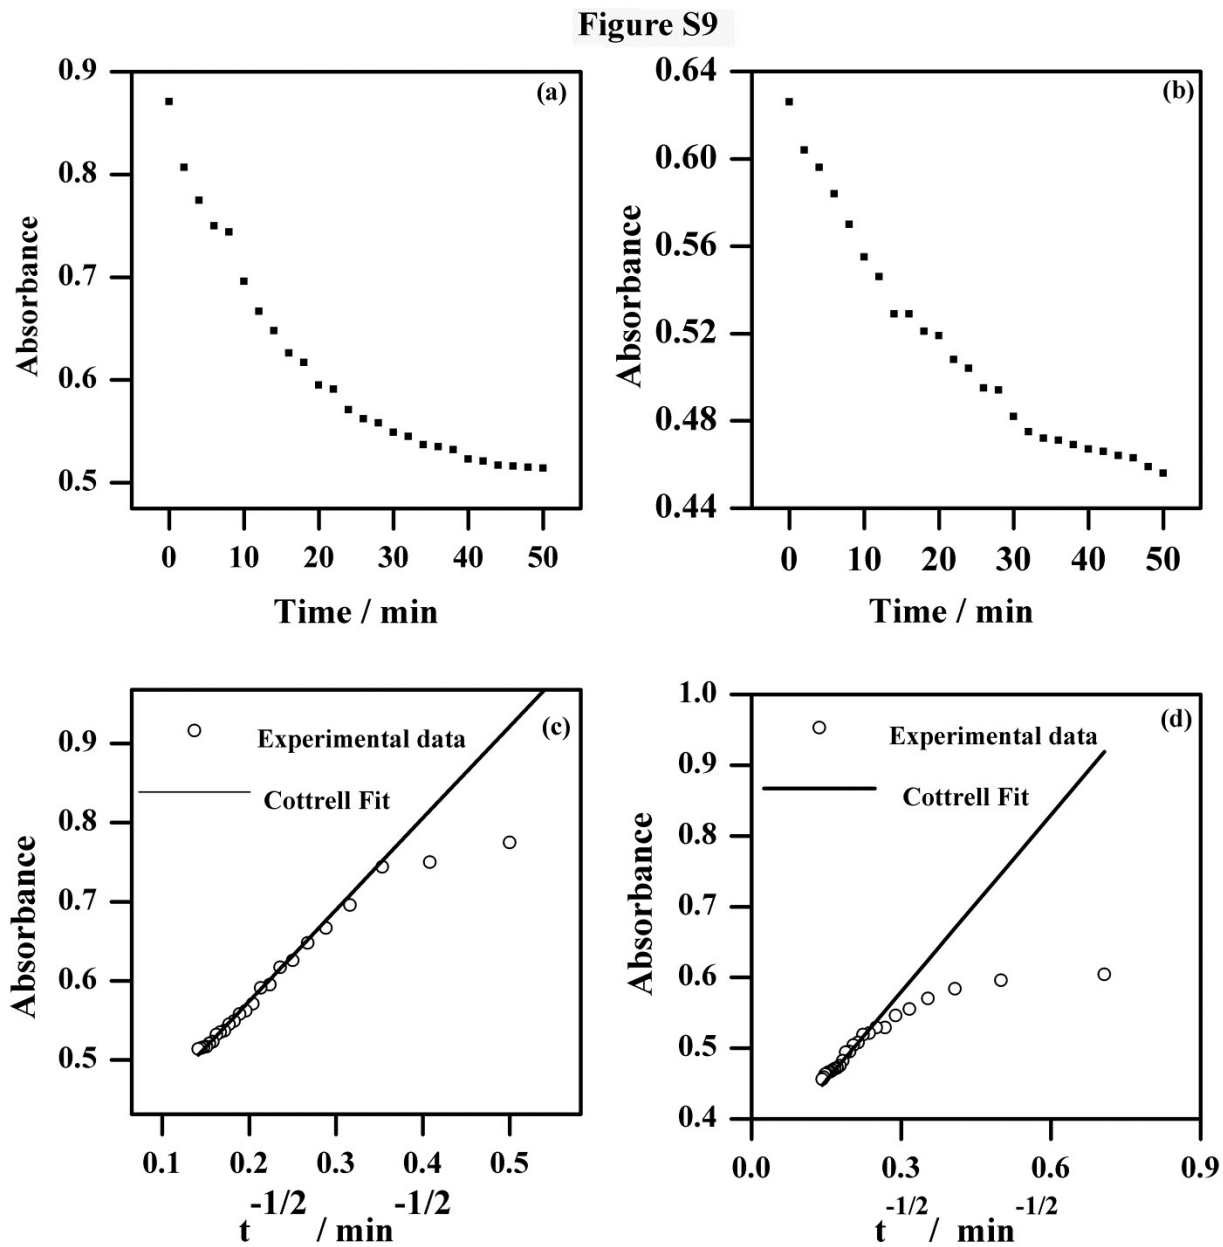

**Fig. S10:** Chronoamperograms obtained at MCPE/MWCNTs/p-DCPIP in 0.1M PBS of pH 7.0 containing 0.1 M KCl for different concentrations of Tyr (in mM): 0.1, 0.3, 0.5, 0.7 and 1.0 (a→e) by setting the potential of working electrode at 620 mV (a). Insets: Plots of  $I$  vs.  $t^{-1/2}$  (b) and plot of the straight lines against the Tyr concentrations (c).

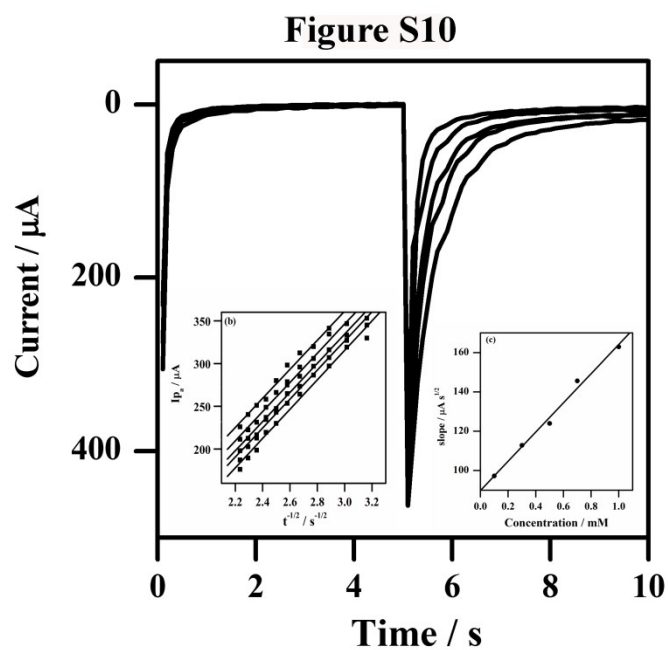

**Fig. S11:** Cyclic voltammograms various concentrations (in mM) of AA ranging from 0.5 to 2.0, DA, UA and Tyr ranging from 0.2 to 1.0 obtained at MCPE/MWCNTs/p-DCPIP in 0.1 M PBS of pH 7.0 containing 0.1 M KCl at a scan rate of 50 mV s<sup>-1</sup>.

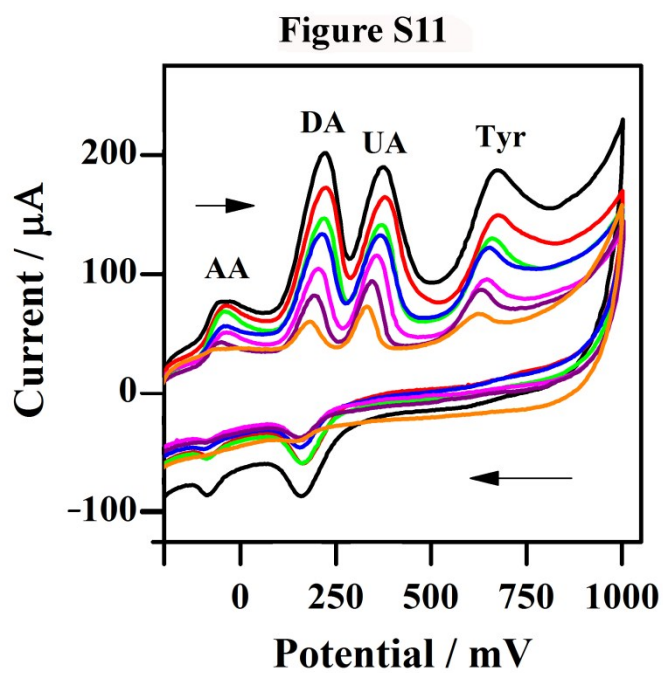

**Fig. S12:** Amperometric response for the addition of Tyr in the presence of various interferents at MCPE/MWNCTs/p-DCPIP in 0.1 M PBS of pH 7.0 containing 0.1 M KCl. Applied potential: 635.0 mV.

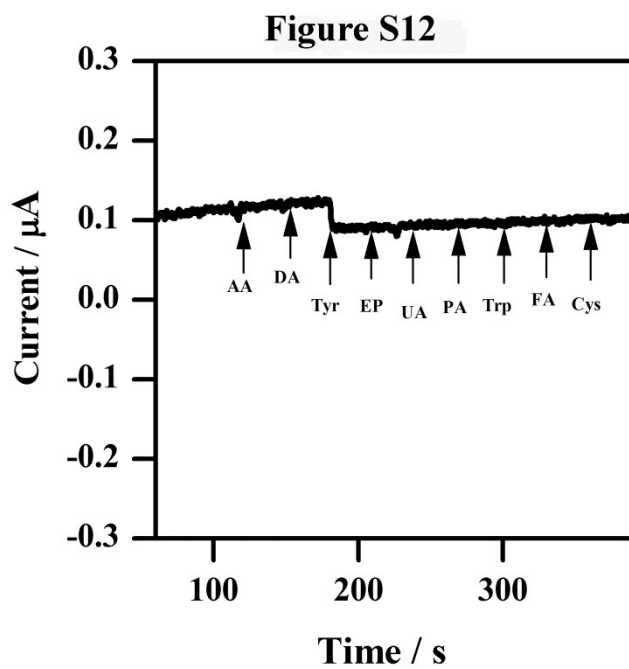

**Fig. S13:** Amperometric response of  $5.0 \times 10^{-4}$  M Tyr at MCPE/MWCNTs/p-DCPIP for 30.0 minutes in 0.1 M PBS of pH 7.0 containing 0.1 M KCl. Applied potential: 635.0 mV.

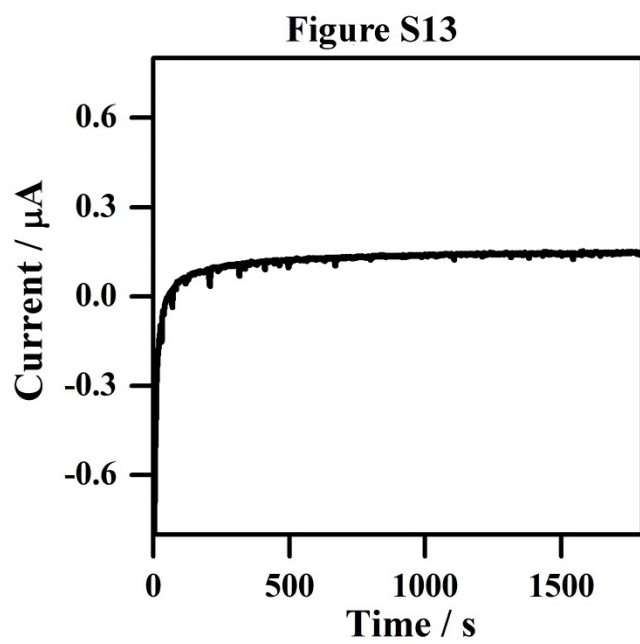

### ***S 1.0. Generation of oxygen functionalities on MWCNTs***

Pretreatment of CNTs prevent them from aggregating thereby increases their biocompatibility. Since the oxygen functionalities on the surface of MWCNTs improve their electrochemical properties, they were generated by treating MWCNTs with a mixture of concentrated H<sub>2</sub>SO<sub>4</sub> and HNO<sub>3</sub> (molar ratio 3:1). In a typical experiment, 75.0 mL of conc. H<sub>2</sub>SO<sub>4</sub> (97%) and 25.0 mL of conc. HNO<sub>3</sub> (65%) were mixed and added to 1.0 g of MWCNTs in a round-bottomed flask and heated under constant agitation at 50.0 °C for 8.0 h. It was allowed to cool down to room temperature after which an equal quantity of deionized water was added. It was filtered and the residue was washed several times with deionized water until neutral pH was attained. The residue was then filtered and freeze-dried [1].

[1] P. Martis, B.R. Venugopal, J.-F. Seffer, J. Delhalle, Z. Mekhalif, Infrared irradiation controlled decoration of multiwalled carbon nanotubes with copper/copper oxide nanocrystals *Acta Mater.* 59 (2011) 5040–5047.
